# Supplementary material
Source: publisher figshare collection journal article supplement (https://asha.figshare.com/articles/dataset/_/28599341)
Supplement: Supplementary file 1 [file 1]

**Supplemental Material S2.** Tukey HSD Ad hoc analyses for significant ANOVA results as a function of age group and financial contribution group.

| Post hoc for age groups                                                                                 | Group 1 | Group 2 | Mean diff. | Std. error | Sig.  | 95% CI Lower | 95% CI Upper |
|---------------------------------------------------------------------------------------------------------|---------|---------|------------|------------|-------|--------------|--------------|
| During my last audiology position, I perceived my job satisfaction to be positive.                      | 21-30   | 31-40   | -.65       | .462       | .507  | -1.88        | .59          |
|                                                                                                         | 21-30   | 41-50   | -.34       | .439       | .086  | -1.52        | .83          |
|                                                                                                         | 21-30   | 51-60   | -1.64*     | .453       | .004  | -2.85        | -.43         |
|                                                                                                         | 31-40   | 41-50   | .31        | .414       | .882  | -.80         | 1.41         |
|                                                                                                         | 31-40   | 51-60   | -.99       | .429       | .111  | -2.14        | .16          |
|                                                                                                         | 41-50   | 51-60   | -1.30*     | .405       | .013  | -2.38        | -.22         |
| Considering my entire career as an audiologist, I perceived my job satisfaction to be positive.         | 21-30   | 31-40   | -.74       | .419       | .306  | -1.86        | .38          |
|                                                                                                         | 21-30   | 41-50   | -.77       | .398       | .230  | -1.83        | .30          |
|                                                                                                         | 21-30   | 51-60   | -1.81*     | .411       | <.001 | -2.90        | -.71         |
|                                                                                                         | 31-40   | 41-50   | -.03       | .375       | 1     | -1.04        | .97          |
|                                                                                                         | 31-40   | 51-60   | -1.07*     | .389       | .042  | -2.11        | -.03         |
|                                                                                                         | 41-50   | 51-60   | -1.04*     | .367       | .035  | -2.02        | -.06         |
| During last position, income was commensurate with education and experience.                            | 21-30   | 31-40   | -.37       | .427       | .818  | -1.52        | .77          |
|                                                                                                         | 21-30   | 41-50   | -1.91*     | .406       | <.001 | -3.00        | -.83         |
|                                                                                                         | 21-30   | 51-60   | -1.97*     | .419       | <.001 | -3.09        | -.85         |
|                                                                                                         | 31-40   | 41-50   | -1.54*     | .383       | .001  | -2.56        | -.51         |
|                                                                                                         | 31-40   | 51-60   | -1.60*     | .397       | .001  | -2.66        | -.54         |
|                                                                                                         | 41-50   | 51-60   | -.06       | .374       | .999  | -1.06        | .94          |
| Throughout entire career, income was commensurate with education and experience.                        | 21-30   | 31-40   | -.10       | .426       | .995  | -1.24        | 1.04         |
|                                                                                                         | 21-30   | 41-50   | -.84       | .405       | .178  | -1.93        | .24          |
|                                                                                                         | 21-30   | 51-60   | -1.56*     | .418       | .003  | -2.67        | -.44         |
|                                                                                                         | 31-40   | 41-50   | -.74       | .382       | .229  | -1.76        | .28          |
|                                                                                                         | 31-40   | 51-60   | -1.45*     | .396       | .004  | -2.51        | -.40         |
|                                                                                                         | 41-50   | 51-60   | -.71       | .373       | .238  | -1.71        | .28          |
| I felt valued at my final position in audiology.                                                        | 21-30   | 31-40   | -.39       | .575       | .902  | -1.93        | 1.15         |
|                                                                                                         | 21-30   | 41-50   | -.52       | .547       | .774  | -1.99        | .94          |
|                                                                                                         | 21-30   | 51-60   | -1.75*     | .564       | .017  | -3.26        | -.24         |
|                                                                                                         | 31-40   | 41-50   | -.13       | .516       | .994  | -1.51        | 1.25         |
|                                                                                                         | 31-40   | 51-60   | -1.36      | .534       | .068  | -2.79        | .07          |
|                                                                                                         | 41-50   | 51-60   | -1.23      | .504       | .086  | -2.57        | .12          |
| During my last audiology position, I often felt lonely. <sup>a</sup>                                    | 21-30   | 31-40   | -.83       | .500       | .360  | -2.17        | .51          |
|                                                                                                         | 21-30   | 41-50   | -.56       | .476       | .650  | -1.83        | .72          |
|                                                                                                         | 21-30   | 51-60   | .61        | .491       | .603  | -.70         | 1.92         |
|                                                                                                         | 31-40   | 41-50   | .27        | .449       | .929  | -.93         | 1.47         |
|                                                                                                         | 31-40   | 51-60   | 1.44*      | .465       | .018  | .20          | 2.68         |
|                                                                                                         | 41-50   | 51-60   | 1.17       | .438       | .051  | -.01         | 2.34         |
| Considering all aspects of being an audiologist, I think the cost of audiology education is reasonable. | 21-30   | 31-40   | -.30       | .302       | .748  | -1.11        | .50          |
|                                                                                                         | 21-30   | 41-50   | -.17       | .287       | .937  | -.93         | .60          |
|                                                                                                         | 21-30   | 51-60   | -1.25*     | .296       | <.001 | -2.04        | -.46         |
|                                                                                                         | 31-40   | 41-50   | .14        | .271       | .958  | -.59         | .86          |
|                                                                                                         | 31-40   | 51-60   | -.95*      | .280       | .008  | -1.70        | -.20         |
|                                                                                                         | 41-50   | 51-60   | -1.08*     | .264       | .001  | -1.79        | -.38         |
| Post hoc Contribution Groups                                                                            | Group 1 | Group 2 | Mean diff. | Std. error | Sig.  | 95% CI       | 95% CI       |

|                                |         |       |        |      |      | Lower | Upper |
|--------------------------------|---------|-------|--------|------|------|-------|-------|
| During last position, income   | S/Prim. | Sec.  | 1.09   | .486 | .078 | -.10  | 2.28  |
| was commensurate with          | S/Prim. | Equal | -.13   | .492 | 0.96 | -1.34 | 1.07  |
| education and experience.      | Sec.    | Equal | -1.22* | .428 | .019 | -2.27 | -.18  |
| Throughout entire career,      | S/Prim. | Sec.  | 1.07   | .442 | .054 | -.01  | 2.15  |
| income was commensurate        | S/Prim. | Equal | -.05   | .448 | .994 | -1.14 | 1.05  |
| with education and experience. | Sec.    | Equal | -1.11* | .390 | .019 | -2.07 | -.16  |

*Note.* Abbreviated items: Std. = Standard, Sig = Significance, CI = Confidence interval, Cont. = Contribution, S/Prim. = Sole/Primary Contributor, Sec. = Secondary Contributor
